# Supplementary material
Source: publisher site journal article supplement (https://www.dovepress.com/article/382275)
Supplement: Supplementary file 1 [file get_supplementary_file.php]

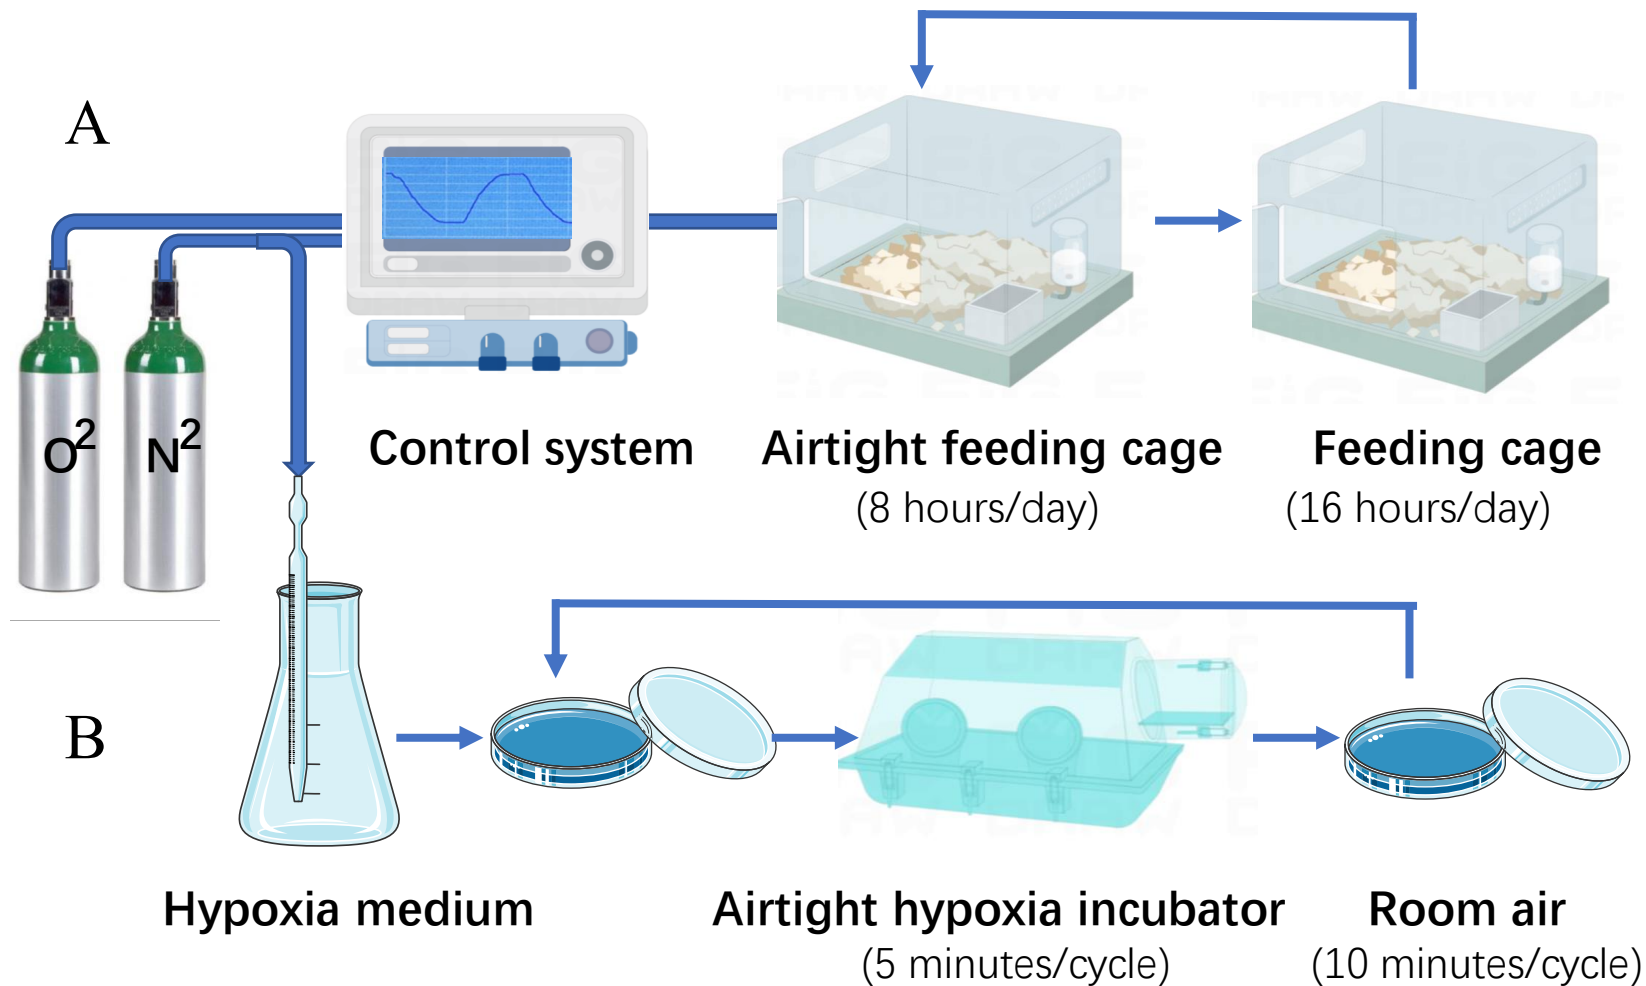

Supplementary figure 1 The schematic diagram of experiment. A, in the animal experiment, the control system regulate the intermittent hypoxia in the airtight feeding cage [(20.9%  $\pm$  0.5%) to (5%  $\pm$  0.5%); 30 episodes per hour; 8 hours per day]. B, in vitro, the plates were changed with hypoxia medium and placed in the airtight incubator periodically (5 minutes per cycle).

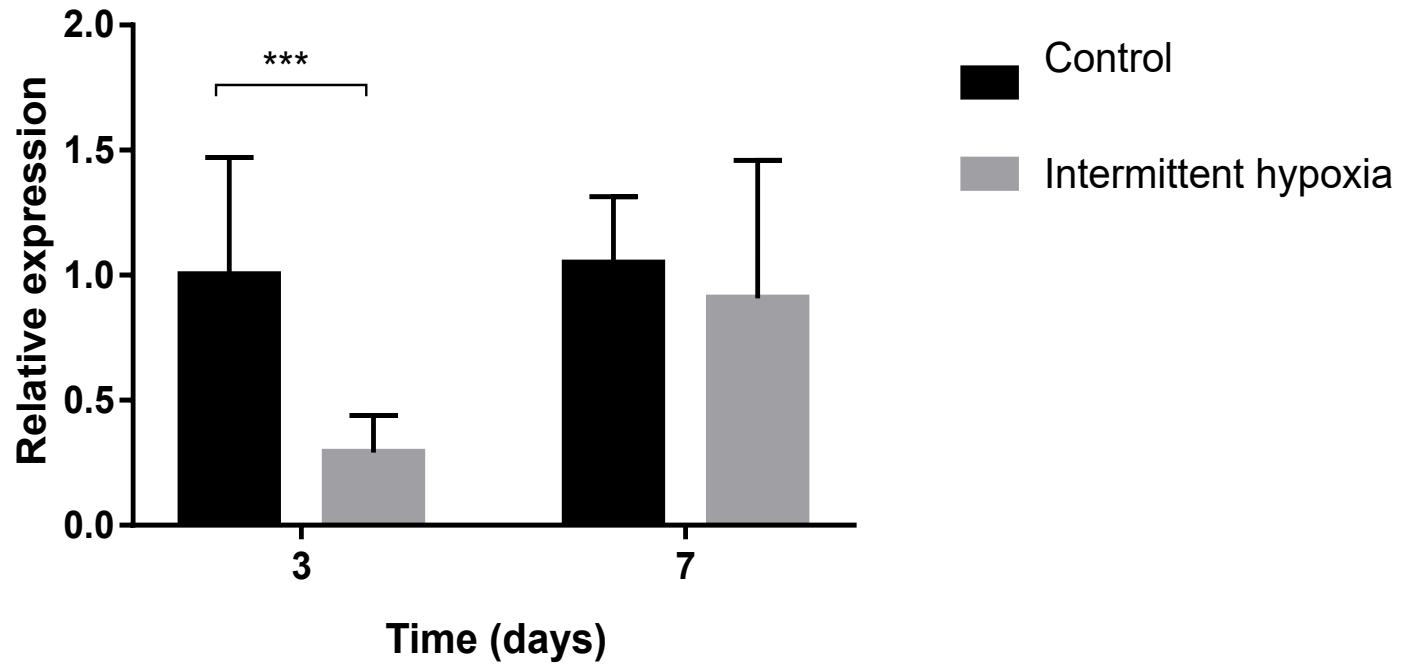

Supplementary figure 2 The relative expression of vascular endothelial growth factor after intermittent hypoxia. \*\*\* $P < 0.001$ .
